# Supplementary material for: Unexpectedly high stability and surface reconstruction of PdAuAg nanoparticles for formate oxidation electrocatalysis
Source: Royal Society of Chemistry journal article supplement (doi:10.1039/d0nr01358g), 2020-01-01
Supplement: d0nr01358g1.pdf [file d0nr01358g1.pdf]

## Electronic Supplementary Information

### Unexpectedly high stability and surface reconstruction of PdAuAg nanoparticles for formate oxidation electrocatalysis

Bowei Pan,<sup>a,b</sup> Fuyi Chen<sup>\*,a,b</sup>, Bo Kou,<sup>b</sup> Junpeng Wang,<sup>b</sup> Quan Tang,<sup>a,b</sup> Longfei Guo,<sup>a,b</sup> Qiao Wang,<sup>a,b</sup>

Zhen Li,<sup>b</sup> Weiqi Bian<sup>b</sup> and Jiali Wang<sup>a,b</sup>

<sup>a</sup> State Key Laboratory of Solidification Processing, Northwestern Polytechnical University, Xi'an,  
710072, China

<sup>b</sup> School of Materials Science and Engineering, Northwestern Polytechnical University, Xi'an,  
710072, China

\*Corresponding author: E-mail: [fuyichen@nwpu.edu.cn](mailto:fuyichen@nwpu.edu.cn)

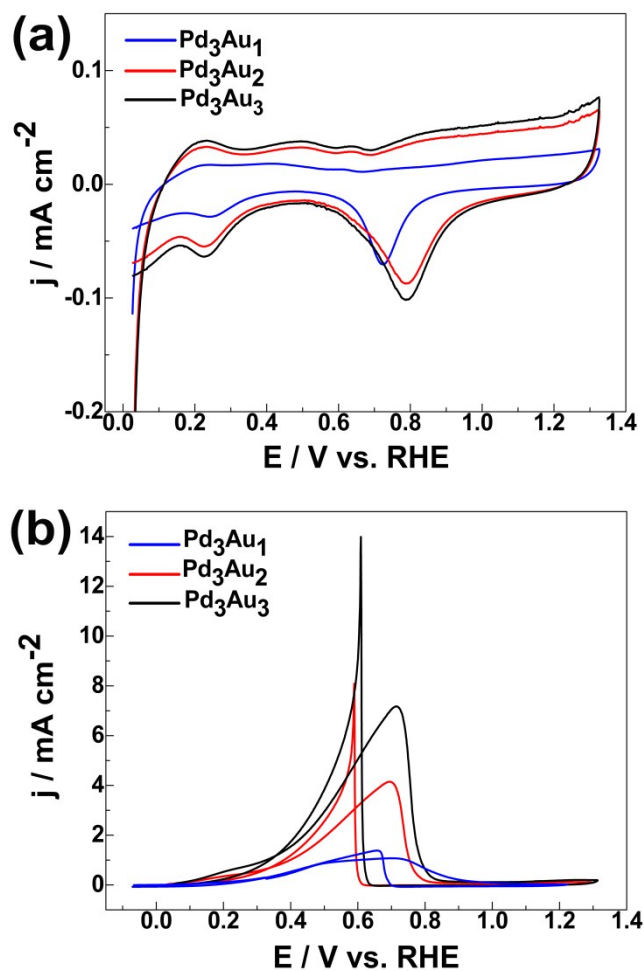

**Figure S1.** Catalytic properties of various PdAu NPs on carbon nanotubes. (a) CV curves in N<sub>2</sub>-saturated 1 M KOH. (b) CV curves for formate oxidation reaction in 1 M KOH + 1 M HCOOK.

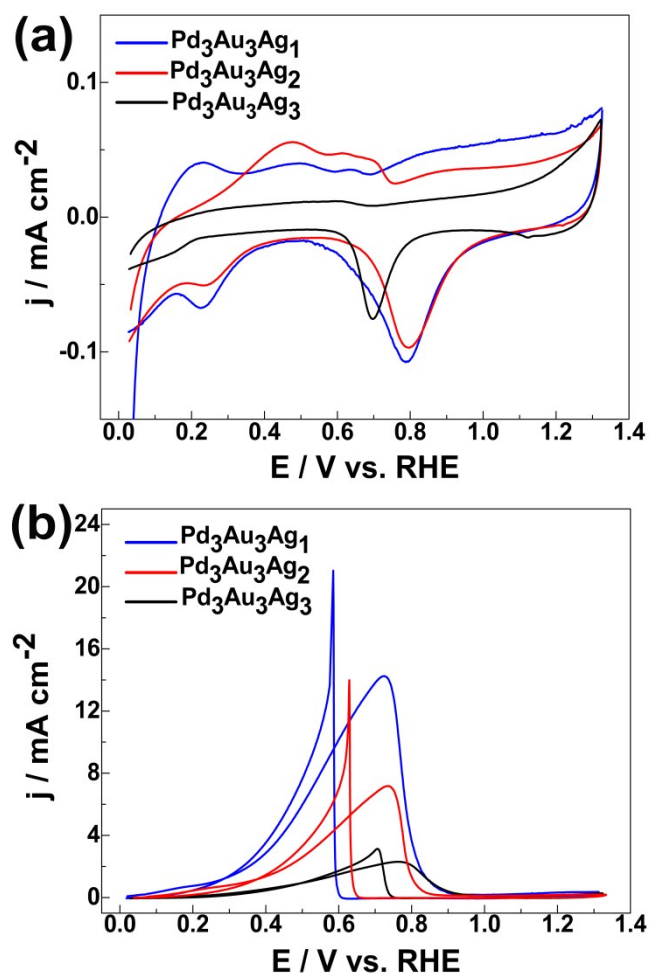

**Figure S2.** Catalytic properties of various PdAuAg NPs on carbon nanotubes. (a) CV curves in N<sub>2</sub>-saturated 1 M KOH. (b) CV curves for formate oxidation reaction in 1 M KOH + 1 M HCOOK.

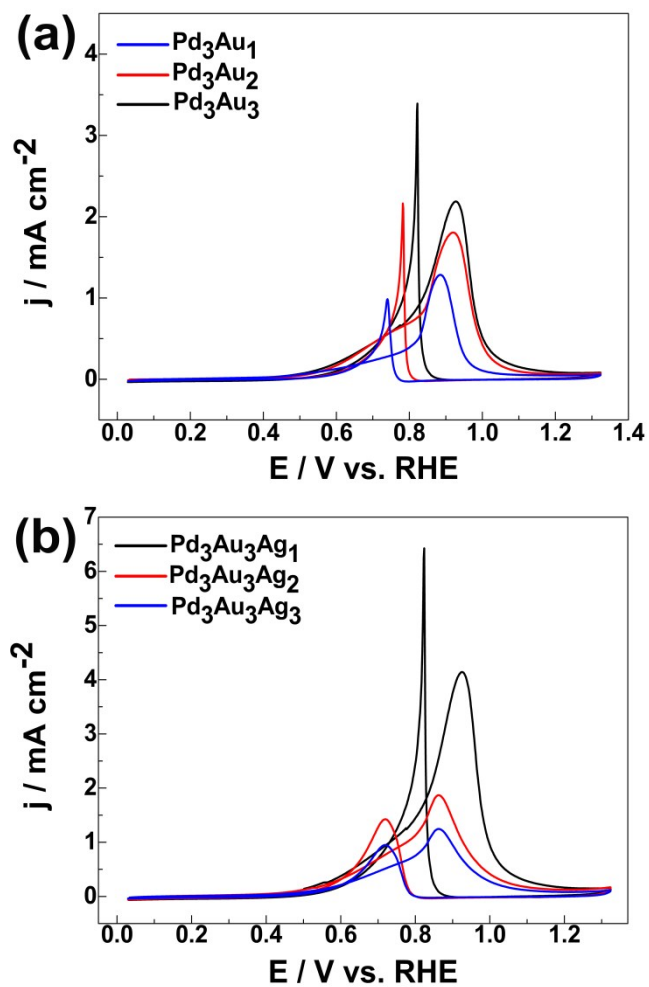

**Figure S3.** (a) CV curves of various PdAu NPs on carbon nanotubes for methanol oxidation reaction in  $1 \text{ M KOH} + 1 \text{ M CH}_3\text{OH}$ . (b) CV curves of various PdAuAg NPs on carbon nanotubes for methanol oxidation reaction in  $1 \text{ M KOH} + 1 \text{ M CH}_3\text{OH}$

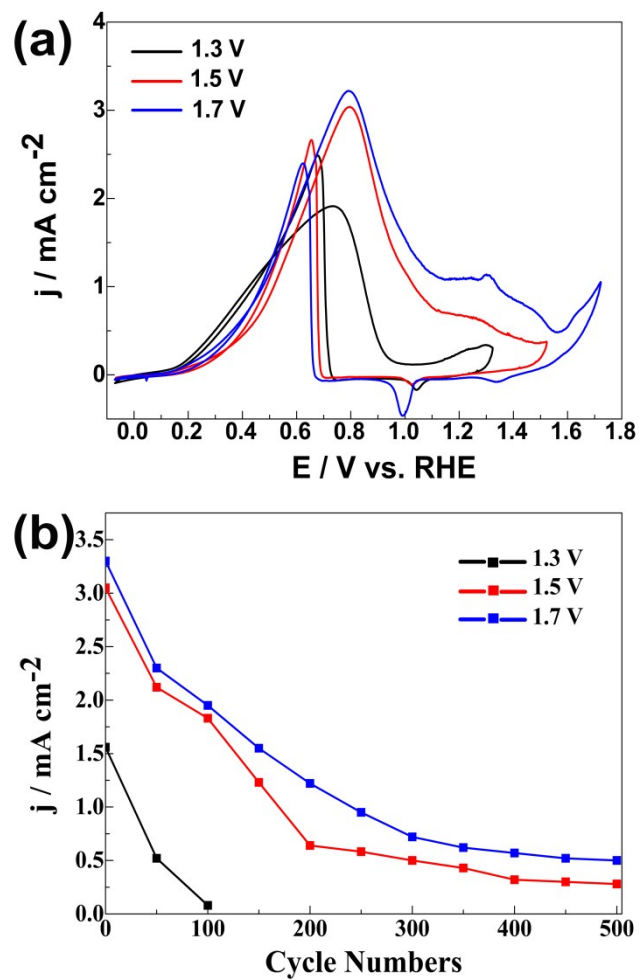

**Figure S4.** (a) CV curves of Pd<sub>3</sub>Au<sub>3</sub>Ag<sub>3</sub> NPs on carbon nanotubes for formate oxidation reaction in 1 M KOH + 1 M HCOOK with various potential ranging from -0.1 to 1.3 V, 1.5 V and 1.7 V vs. RHE. (b) Cycling stability curves of Pd<sub>3</sub>Au<sub>3</sub>Ag<sub>3</sub> NPs on carbon nanotubes after pretreatment in potential range from -0.1 to 1.3 V, 1.5 V and 1.7 V vs. RHE.

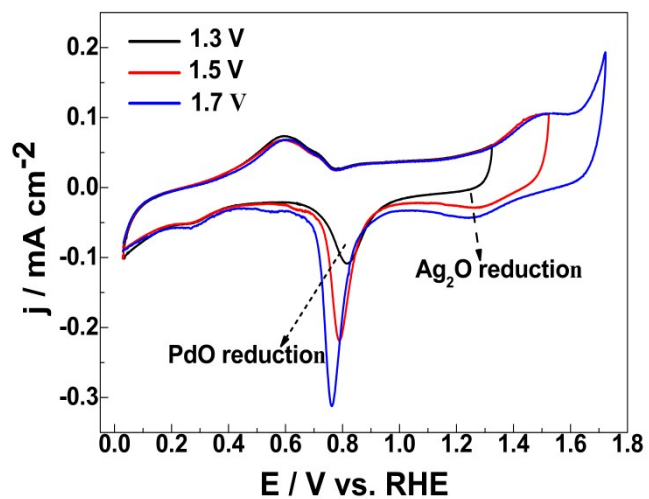

**Figure S5.** CV curves of Pd<sub>3</sub>Au<sub>3</sub>Ag<sub>1</sub> NPs on carbon nanotubes in 1 M KOH with various potential ranging from -0.1 to 1.3 V, 1.5 V and 1.7 V vs. RHE.

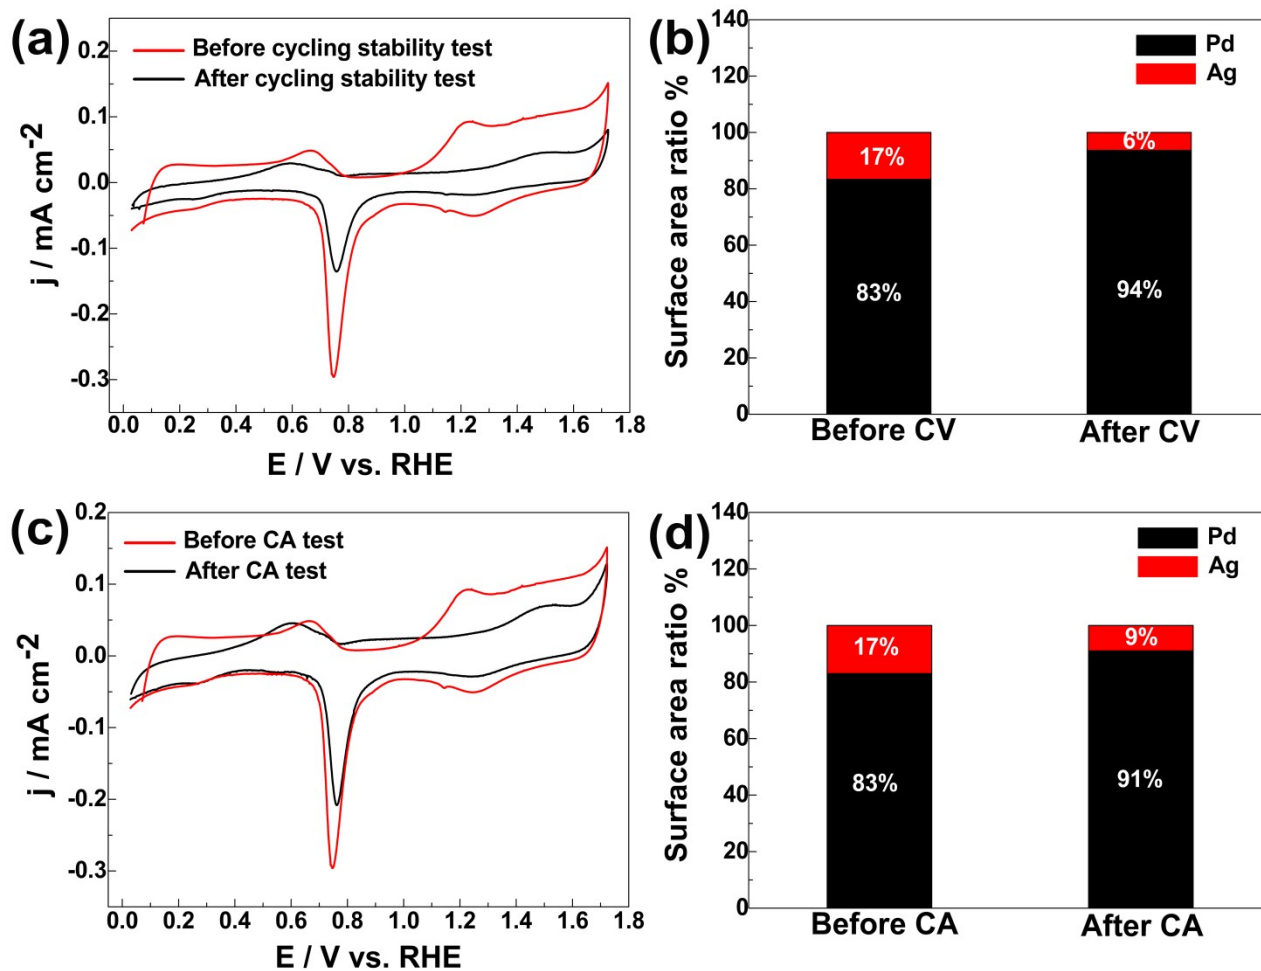

**Figure S6.** (a) CV curves of Pd<sub>3</sub>Au<sub>3</sub>Ag<sub>1</sub> NPs on carbon nanotubes before and after FOR cycling stability test in 1 M KOH. (b) Surface area ratio of Pd and Ag before and after FOR cycling stability test. (c) CV curves of Pd<sub>3</sub>Au<sub>3</sub>Ag<sub>1</sub> NPs on carbon nanotubes before and after CA stability test in 1 M KOH. (d) Surface area ratio of Pd and Ag before and after CA stability test.

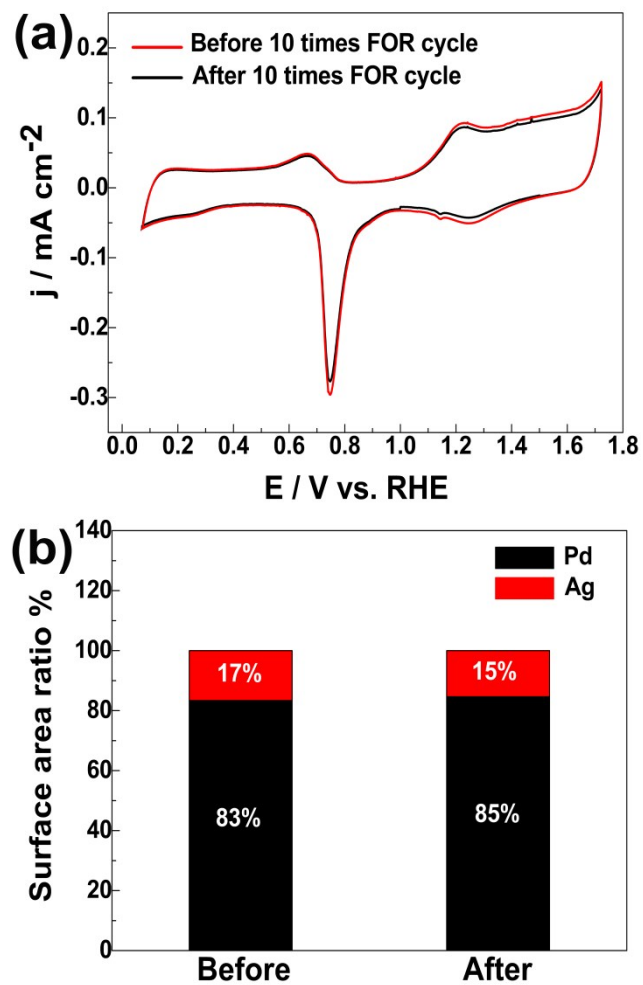

**Figure S7.** (a) CV curves of Pd<sub>3</sub>Au<sub>3</sub>Ag<sub>1</sub> NPs on carbon nanotubes before and after 10 times FOR cycles in 1 M KOH. (b) Surface area ratio of Pd and Ag before and after 10 times FOR cycles.



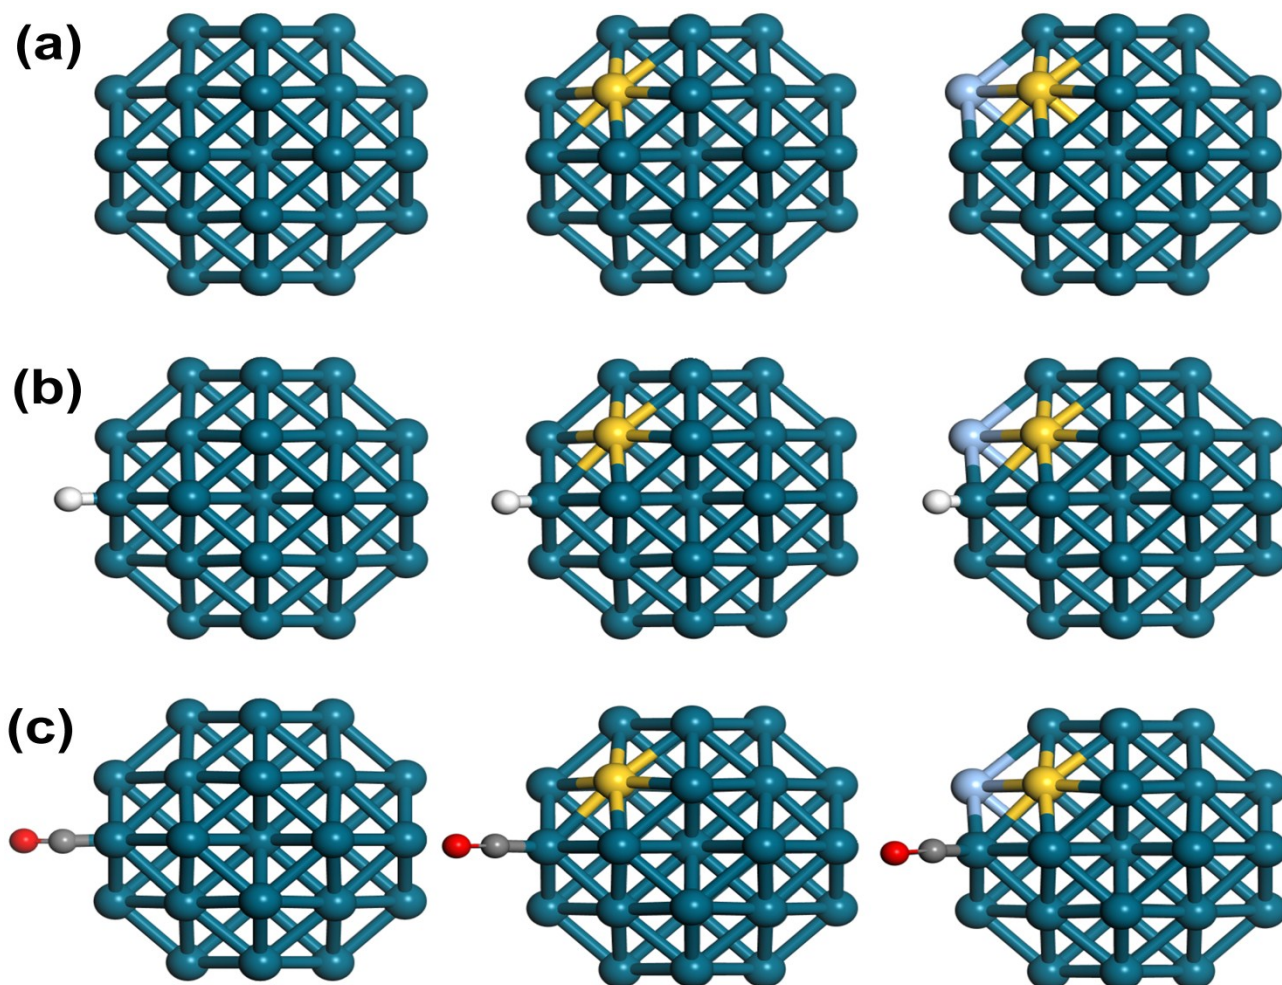

**Figure S8.** Structure models of (a) Pure Pd<sub>38</sub>, Pd<sub>37</sub>Au and Pd<sub>36</sub>AuAg. (b) Pure Pd<sub>38</sub>, Pd<sub>37</sub>Au and Pd<sub>36</sub>AuAg with H adsorption. (c) Pure Pd<sub>38</sub>, Pd<sub>37</sub>Au and Pd<sub>36</sub>AuAg with CO adsorption. (Green, yellow, blue, white, gray and red spheres indicate Pd, Au, Ag, H, C and O)

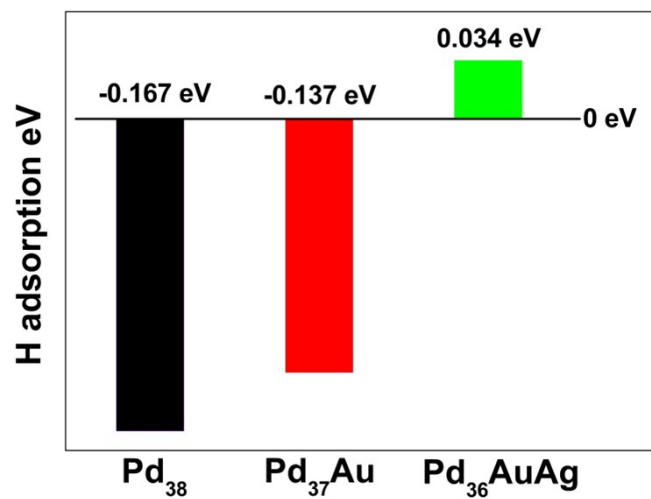

Figure S9. Hydrogen adsorption energy (eV) on pure Pd<sub>38</sub>, Pd<sub>37</sub>Au and Pd<sub>36</sub>AuAg nanoalloy.

**Table S1.** Molar ratios of metal precursors during the synthetic process and EDS composition for different PdAu/CNT and PdAuAg/CNT catalysts.

| Catalyst Name                                        | Pd(NO <sub>3</sub> ) <sub>2</sub> (10 mM) | HAuCl <sub>4</sub> (10 mM) | AgNO <sub>3</sub> (10 mM) | EDS composition (wt %) |      |     |      |
|------------------------------------------------------|-------------------------------------------|----------------------------|---------------------------|------------------------|------|-----|------|
|                                                      |                                           |                            |                           | Pd                     | Au   | Ag  | C    |
| Pd <sub>3</sub> Au <sub>1</sub> /CNT                 | 9 mL                                      | 3 mL                       | -                         | 21.3                   | 13.3 | -   | 65.4 |
| Pd <sub>3</sub> Au <sub>3</sub> /CNT                 | 6 mL                                      | 6 mL                       | -                         | 13.4                   | 25.4 | -   | 61.2 |
| Pd <sub>3</sub> Au <sub>3</sub> Ag <sub>1</sub> /CNT | 5.1 mL                                    | 5.1 mL                     | 1.7 mL                    | 11.2                   | 20.3 | 3.9 | 64.6 |
| Pd <sub>3</sub> Au <sub>3</sub> Ag <sub>3</sub> /CNT | 4 mL                                      | 4 mL                       | 4 mL                      | 8.2                    | 14.5 | 8.8 | 68.5 |

**Table S2.** Calculated adsorption energies (eV) of H and CO on the surface of Pd<sub>38</sub>, Pd<sub>37</sub>Au and Pd<sub>36</sub>AuAg

|                       | adsorption energy of H* | adsorption energy of CO* |
|-----------------------|-------------------------|--------------------------|
| Pd <sub>38</sub>      | -0.167                  | -1.381                   |
| Pd <sub>37</sub> Au   | -0.137                  | -1.376                   |
| Pd <sub>36</sub> AuAg | 0.034                   | -1.372                   |

**Table S3.** A literature survey of the activity of Pd-based FOR catalysts in alkaline media

| Catalyst                                             | Electrolyte               | Scan rate<br>(mV·s <sup>-1</sup> ) | Specific Activity<br>(mA·cm <sup>-2</sup> ) | Mass activity<br>(A·mg <sub>Pd</sub> <sup>-1</sup> ) | Reference        |
|------------------------------------------------------|---------------------------|------------------------------------|---------------------------------------------|------------------------------------------------------|------------------|
| Pd <sub>3</sub> Au <sub>3</sub> Ag <sub>1</sub> /CNT | 1 M KOH + 1 M HCOOK       | 50                                 | 14.47                                       | 4.51                                                 | <b>This work</b> |
| PdH/C                                                | 1 M KOH + 0.1 M HCOOK     | 20                                 | 0.1                                         | -                                                    | 1                |
| Pd <sub>4</sub> Ag <sub>1</sub> /C                   | 1 M NaOH + 0.1 M HCOONa   | 50                                 | -                                           | 0.04                                                 | 2                |
| PdCu/C                                               | 1 M KOH + 1 M HCOOK       | 30                                 | 3.5                                         | -                                                    | 3                |
| PdAu/Ni foma                                         | 0.5 M NaOH + 0.1 M HCOONa | 50                                 | 0.8                                         | -                                                    | 4                |
| CuPdAu/C                                             | 0.5 M KOH + 0.5 M HCOOK   | 50                                 | -                                           | 1.2                                                  | 5                |
| PdAgCu aergels                                       | 1 M KOH + 1 M HCOOK       | 50                                 | 10.1                                        | 2.7                                                  | 6                |
| PdAgPt aergels                                       | 0.5 M KOH + 0.5 M HCOOK   | 50                                 | 3.5                                         | 2.9                                                  | 7                |
| Pd <sub>2,3</sub> Co/C                               | 1 M KOH + 1 M HCOOK       | 50                                 | -                                           | 2.5                                                  | 8                |
| PdNi/C                                               | 1 M KOH + 1 M HCOOK       | 50                                 | 12                                          | 4.5                                                  | 9                |
| PdRh/C                                               | 1 M KOH + 1 M HCOOK       | 50                                 | 8.1                                         | 4.5                                                  | 10               |
| Pd <sub>72</sub> Ce <sub>28</sub> /C                 | 1 M KOH + 1 M HCOOK       | 50                                 | 19.4                                        | 1.1                                                  | 11               |
| AgPd/rGO                                             | 1 M KOH + 1 M HCOOK       | 50                                 | -                                           | 4.21                                                 | 12               |

**Table S4.** Durability of Pd-based FOR catalysts after CA measurements for 3600 s

| Catalyst                                             | Electrolyte             | The retained mass activity<br>after CA measurements for 3600 s<br>(A mg <sub>Pd</sub> <sup>-1</sup> ) | Reference        |
|------------------------------------------------------|-------------------------|-------------------------------------------------------------------------------------------------------|------------------|
| Pd <sub>3</sub> Au <sub>3</sub> Ag <sub>1</sub> /CNT | 1 M KOH + 1 M HCOOK     | 1.32                                                                                                  | <b>This work</b> |
| Pd <sub>4</sub> Ag <sub>1</sub> /C                   | 1 M NaOH + 0.1 M HCOONa | 0.01                                                                                                  | 2                |
| CuPdAu/C                                             | 0.5 M KOH + 0.5 M HCOOK | 0.03                                                                                                  | 5                |
| PdAgCu aergels                                       | 1 M KOH + 1 M HCOOK     | 0.01                                                                                                  | 6                |
| Pd <sub>2,3</sub> Co/C                               | 1 M KOH + 1 M HCOOK     | 0.2                                                                                                   | 8                |
| PdRh/C                                               | 1 M KOH + 1 M HCOOK     | 0.5                                                                                                   | 10               |
| Pd <sub>72</sub> Ce <sub>28</sub> /C                 | 1 M KOH + 1 M HCOOK     | 0.01                                                                                                  | 11               |
| AgPd/rGO                                             | 1 M KOH + 1 M HCOOK     | 0.12                                                                                                  | 12               |

## References

1. M. Choun, K. Ham, D. Shin, J. Lee and J. Lee, *Catalysis Today*, 2017, **295**, 26-31.
2. S. Chowdhury, S. Ghosh and S. Bhattachrya, *Electrochimica Acta*, 2017, **225**, 310-321.
3. J. Noborikawa, J. Lau, J. Ta, S. Hu, L. Scudiero, S. Derakhshan, S. Ha and J. Haan, *Electrochimica Acta*, 2014, **137**, 654-660.
4. Y. Li, Y. He and W. Yang, *Journal of Power Sources*, 2015, **278**, 569-573.
5. H. Mao, T. Huang and A. Yu, *International Journal of Hydrogen Energy*, 2016, **41**, 13190-13196.
6. Q. Wang, F. Chen, L. Guo, T. Jin, H. Liu, X. Wang, X. Gong and Y. Liu, *Journal of Materials Chemistry A*, 2019, **7**, 16122-16135.
7. J. Wang, F. Chen, Y. Jin, L. Guo, X. Gong, X. Wang and R. Johnston, *Nanoscale*, 2019, **11**, 14174-14185.
8. S. Sankar, G. Anilkumar, T. Tamaki and T. Yamaguchi, *ACS Applied Energy Materials*, 2018, **1**, 4140-4149.
9. S. Sasidharan, G. Anilkumar, T. Tamaki and T. Yamaguchi, *ChemCatChem*, 2019, DOI: 10.1002/cctc.201900960.
10. J. Bai, Q. Xue, Y. Zhao, J. Jiang, J. Zeng, S. Yin and Y. Chen, *ACS Sustainable Chemistry & Engineering*, 2019, **7**, 2830-2836.
11. Q. Tang, F. Chen, T. Jin, L. Guo, Q. Wang and H. Liu, *Journal of Materials Chemistry A*, 2019, **7**, 22996-23007.
12. L. Guo, F. Chen, T. Jin, H. Liu, N. Zhang, Y. Jin, Q. Wang, Q. Tang and B. Pan, *Nanoscale*, 2020, **12**, 3469-3481.
